# Supplementary material for: Engineering extracellular vesicles to permeabilize the blood-brain barrier
Source: Research Square preprint supplement (doi:10.21203/rs.3.rs-4509869/v1), 2024-06-26
Supplement: Supplementary file 1 [file 36ec270f41598ccecd5151fd.xlsx]

## Sheet: affecting the BBB
	miRNAs	Ma et al. 2016	mishra 2013	wang 2018	yu 2017	bai 2016/2018	cai 2015	fang 2016	pena philippides 2018/caballero garrido 2015	lopez-ramirez 2014	barker 2017	ma 2014	tominaga 2015	guo 2017	zhao 2015 c	ma 2017	kalani 2014	bukeirat 2016	zhao 2015	zhao 2014	chu 2021	toyama 2018	leng 2018	zhang 2020	matsuoka 2018	gu 2017	xu 2017	burek 2019	pei 2016	lin 2019	ye 2019	ma 2020 review	Zhou 2014	miao 2015	muramatsu 2013	lalwani 2012	young 2013	zhu 2014	wang 2016	chen 2012	toyama 2016	citations
		10.1016/j.bbagrm.2015.11.008	10.1523/JNEUROSCI.4796-12.2013	10.1096/fj.201700139RRR	10.1038/oncsis.2017.7	10.1038/srep35642	10.18632/oncotarget.4331	10.1096/fj.201500126	10.1161/JAHA.118.009244	10.1096/fj.13-248880	10.2119/molmed.2016.00139	10.1038/jcbfm.2014.152	10.1038/ncomms7716	10.1016/j.bbadis.2017.02.005	10.1016/j.cellsig.2014.10.008	10.3390/ijms18071356	10.1038/jcbfm.2014.74	10.1177/0271678X15606147	10.1091/mbc.E14-10-1474	10.1002/jcp.24799	10.1096/fj.202002086RR	10.1161/ATVBAHA.118.310822	10.1186/s13046-018-0886-0	10.1155/2020/1237678	10.1016/j.bbrc.2018.03.063	10.1002/1873-3468.12565	10.1038/cr.2017.62	10.1007/s12975-018-0683-2	10.1159/000447838	10.1016/j.bbrc.2019.07.075	ISSN:1940-5901/IJCEM0087796	10.1016/j.expneurol.2019.113094	10.1016/j.ccr.2014.03.007	10.1016/j.cellsig.2014.10.008	10.1038/onc.2012.68	10.1371/journal.pone.0052588	10.1182/blood-2012-12-473017	10.1038/srep05524	10.1007/s13277-016-4964-7	10.1093/neuonc/nos122	10.2174/1567201813666160830124627
	miR-155								hsa, mmu	mmu	mmu																															3
	miR-132-3p																										hsa	hsa, mmu														2
	miR-22-3p																							hsa		hsa																2
	miR-34a																	hsa	hsa																							2
	miR-124-3p																								rno																hsa	2
	miR-18a														hsa																			x								2
	miR-101		hsa																																							1
	miR-143					mmu																																				1
	miR-130a			rno																																						1
	miR-137				hsa																																					1
	miR-140	hsa																																								1
	miR-144						hsa																																			1
	miR-150							rno																																		1
	miR-181a											hsa																														1
	miR-181c												mmu																													1
	miR-181d-5p													hsa																												1
	miR-210															rno																										1
	miR-212																											hsa, mmu														1
	miR-29b																mmu																									1
	miR-34c																			hsa																						1
	miR-383																												mmu													1
	miR-424-5p																													hsa												1
	miR-429																				mmu																					1
	miR-466c																														mmu											1
	miR-501-3p																					mmu																				1
	piR-DQ590027/miR-17HG																						hsa																			1
	miR-15a/16-1																															mmu										1
	miR-105																																x									1
	miR-125b																																		x							1
	miR-142a-3p																																			x						1
	miR-27a																																				x					1
	miR-302c																																					x				1
	miR-26b-5p																																						x			1
	miR-23b																																							x		1
	miR-497-3p																																								hsa	1
	miR-122-5p																																								hsa	1
		1	1	1	1	1	1	1	1	1	1	1	1	1	1	1	1	1	1	1	1	1	1	1	1	1	1	1	1	1	1	1	1	1	1	1	1	1	1	1	1	40
