# Supplementary material for: Engineering extracellular vesicles to permeabilize the blood-brain barrier
Source: Research Square preprint supplement (doi:10.21203/rs.3.rs-4509869/v1), 2024-06-26
Supplement: Supplementary file 2 [file 5151f72f45b9034623b75bdc.xlsx]

## Sheet: final intersection list
miRNAs intersection
miR-132-3p
miR-22-3p
miR-34a
miR-124-3p
miR-101-3p
miR-181c-5p
miR-181d-5p
miR-34c
miR-383
miR-501-3p
miR-142a-3p
miR-122-5p
