# Supplementary material for: Engineering extracellular vesicles to permeabilize the blood-brain barrier
Source: Research Square preprint supplement (doi:10.21203/rs.3.rs-4509869/v1), 2024-06-26
Supplement: Supplementary file 3 [file 6df09ea556691d3c7dba0d52.xlsx]

## Sheet: upregulated in old
	Fehlmann et al.	Mensà et al.	Huan et al.	Zhang et al.,	Meder et al.	Olivieri et al.	Elshawary et al.	Alibhai et al.	Tsukamoto et al.	Fulzele et al.	citations
	10.1038/s41467-020-19665-1	10.1080/20013078.2020.1725285	10.1111/acel.12687	10.1093/gerona/glu145	10.1373/clinchem.2014.224238	10.1016/j.mad.2012.09.004	10.1111/j.1474-9726.2012.00824.x	10.1111/acel.13103	10.1016/j.isci.2020.101520	10.18632/aging.101874
miR-30c-5p	hsa				hsa	hsa	hsa				4
miR-28-3p	hsa	hsa	hsa								3
miR-192-5p	hsa			hsa					mmu		3
miR-19b-3p	hsa					hsa			mmu		3
miR-320d	hsa				hsa		hsa				3
miR-320c	hsa				hsa		hsa				3
miR-320b	hsa			hsa			hsa				3
miR-22-3p	hsa		hsa					mmu			3
miR-21-5p		hsa				hsa		mmu			3
miR-664a-3p			hsa		hsa		hsa				3
miR-331-3p					hsa	hsa	hsa				3
miR-92a-3p		hsa		hsa							2
miR-181b-5p	hsa	hsa									2
miR-8084	hsa	hsa									2
miR-140-3p	hsa								mmu		2
miR-146a-5p	hsa							mmu			2
miR-212-3p	hsa					hsa					2
miR-335-5p	hsa					hsa					2
miR-30b-5p	hsa								mmu		2
miR-500a-5p	hsa		hsa								2
miR-1301-5p	hsa			hsa							2
miR-629-3p	hsa		hsa								2
miR-589-3p	hsa		hsa								2
miR-484	hsa					hsa					2
miR-10b-5p	hsa								mmu		2
miR-29a-3p	hsa		hsa								2
miR-151a-5p	hsa		hsa								2
miR-185-5p	hsa		hsa								2
miR-132-3p	hsa		hsa								2
miR-151a-3p	hsa		hsa								2
miR-223-3p	hsa							mmu			2
miR-425-5p	hsa					hsa					2
miR-324-3p	hsa						hsa				2
miR-29c-5p	hsa				hsa						2
miR-339-3p	hsa					hsa					2
miR-423-5p	hsa						hsa				2
miR-194-5p	hsa							mmu			2
miR-125a-5p		hsa	hsa								2
miR-27b-3p		hsa	hsa								2
miR-186-5p			hsa			hsa					2
miR-1260a			hsa		hsa						2
miR-151-3p					hsa		hsa				2
miR-720					hsa		hsa				2
miR-30d					hsa		hsa				2
miR-197-3p					hsa		hsa				2
miR-30a-5p					hsa				mmu		2
miR-339-5p					hsa		hsa				2
miR-328-3p						has		mmu			2
miR-34a-5p	hsa									mmu	2
miR-222				hsa							1
miR-375				hsa							1
miR-6879-5p	hsa										1
miR-3621	hsa										1
miR-6722-3p	hsa										1
miR-4497	hsa										1
miR-4492	hsa										1
miR-514b-5p	hsa										1
miR-4499	hsa										1
miR-4657	hsa										1
miR-4779	hsa										1
miR-5700	hsa										1
miR-8072	hsa										1
miR-652-3p	hsa										1
miR-3141	hsa										1
miR-939-5p	hsa										1
miR-4716-3p	hsa										1
miR-4746-5p	hsa										1
miR-6784-5p	hsa										1
miR-6727-5p	hsa										1
miR-515-5p	hsa										1
miR-6821-3p	hsa										1
miR-4258	hsa										1
miR-4251	hsa										1
miR-4757-3p	hsa										1
miR-4655-3p	hsa										1
miR-3145-5p	hsa										1
miR-885-5p	hsa										1
miR-6771-5p	hsa										1
miR-6732-5p	hsa										1
miR-133a-5p	hsa										1
miR-6779-5p	hsa										1
miR-3200-5p	hsa										1
miR-6778-5p	hsa										1
miR-6516-5p	hsa										1
miR-4269	hsa										1
miR-6088	hsa										1
miR-6087	hsa										1
miR-6084	hsa										1
miR-6085	hsa										1
miR-6081	hsa										1
miR-4539	hsa										1
miR-4535	hsa										1
miR-2909	hsa										1
miR-4646-5p	hsa										1
miR-6747-3p	hsa										1
miR-6733-5p	hsa										1
miR-1915-5p	hsa										1
miR-378a-5p	hsa										1
miR-3938	hsa										1
miR-6893-3p	hsa										1
miR-181d-5p	hsa										1
miR-550b-3p	hsa										1
miR-4778-5p	hsa										1
miR-4433b-3p	hsa										1
miR-4667-5p	hsa										1
miR-549a	hsa										1
miR-138-1-3p	hsa										1
miR-2392	hsa										1
miR-497-5p	hsa										1
miR-330-3p	hsa										1
miR-617	hsa										1
miR-5580-3p	hsa										1
miR-4758-5p	hsa										1
miR-3164	hsa										1
miR-320e	hsa										1
miR-3161	hsa										1
miR-4429	hsa										1
miR-6833-5p	hsa										1
miR-770-5p	hsa										1
miR-4768-5p	hsa										1
miR-3945	hsa										1
miR-3677-5p	hsa										1
miR-1909-3p	hsa										1
miR-6826-5p	hsa										1
miR-6763-5p	hsa										1
miR-4436a	hsa										1
miR-1304-5p	hsa										1
miR-2115-3p	hsa										1
miR-1199-5p	hsa										1
miR-548n	hsa										1
miR-548s	hsa										1
miR-548p	hsa										1
miR-4518	hsa										1
miR-4445-3p	hsa										1
miR-6857-5p	hsa										1
miR-4781-3p	hsa										1
miR-342-3p	hsa										1
miR-532-3p	hsa										1
miR-8069	hsa										1
miR-5591-5p	hsa										1
miR-4743-5p	hsa										1
miR-6846-5p	hsa										1
miR-6880-5p	hsa										1
miR-765	hsa										1
miR-6840-3p	hsa										1
miR-380-5p	hsa										1
miR-3648	hsa										1
miR-615-5p	hsa										1
miR-3607-5p	hsa										1
miR-6807-5p	hsa										1
miR-6894-5p	hsa										1
miR-4507	hsa										1
miR-4508	hsa										1
miR-3181	hsa										1
miR-3188	hsa										1
miR-5581-5p	hsa										1
miR-584-5p	hsa										1
miR-4768-3p	hsa										1
miR-4298	hsa										1
miR-8071	hsa										1
miR-1231	hsa										1
miR-152-3p	hsa										1
miR-6750-5p	hsa										1
miR-4800-5p	hsa										1
miR-4676-5p	hsa										1
miR-641	hsa										1
miR-646	hsa										1
miR-3127-5p	hsa										1
miR-3196	hsa										1
miR-3198	hsa										1
miR-6753-3p	hsa										1
miR-6132	hsa										1
miR-3190-3p	hsa										1
miR-6131	hsa										1
miR-3619-5p	hsa										1
miR-421	hsa										1
miR-187-3p	hsa										1
miR-5739	hsa										1
miR-5009-3p	hsa										1
miR-4783-5p	hsa										1
miR-218-1-3p	hsa										1
miR-1469	hsa										1
miR-2861	hsa										1
miR-7162-3p	hsa										1
miR-4659a-3p	hsa										1
miR-509-5p	hsa										1
miR-5691	hsa										1
miR-5695	hsa										1
miR-4772-5p	hsa										1
miR-8087	hsa										1
miR-3607-3p	hsa										1
miR-3976	hsa										1
miR-4419b	hsa										1
miR-6127	hsa										1
miR-6126	hsa										1
miR-663a	hsa										1
miR-512-3p	hsa										1
miR-99b-3p	hsa										1
miR-3194-5p	hsa										1
miR-3162-5p	hsa										1
miR-3156-5p	hsa										1
miR-873-5p	hsa										1
miR-921	hsa										1
miR-922	hsa										1
miR-6783-5p	hsa										1
miR-627-5p	hsa										1
miR-125b-1-3p	hsa										1
miR-6875-5p	hsa										1
miR-4653-3p	hsa										1
miR-204-3p	hsa										1
miR-1255a	hsa										1
miR-3907	hsa										1
miR-4773	hsa										1
miR-5684	hsa										1
miR-556-5p	hsa										1
miR-1292-5p	hsa										1
miR-1273d	hsa										1
miR-1273e	hsa										1
miR-1273f	hsa										1
miR-758-5p	hsa										1
miR-125a-3p	hsa										1
miR-6847-5p	hsa										1
miR-4280	hsa										1
miR-4703-5p	hsa										1
miR-3202	hsa										1
miR-483-5p	hsa										1
miR-548ae-3p	hsa										1
miR-4792	hsa										1
miR-4428	hsa										1
miR-320a	hsa										1
miR-4422	hsa										1
miR-4421	hsa										1
miR-6769b-5p	hsa										1
miR-6876-5p	hsa										1
miR-5100	hsa										1
miR-7107-5p	hsa										1
miR-1245b-3p	hsa										1
miR-4732-5p	hsa										1
miR-3934-5p	hsa										1
miR-6788-5p	hsa										1
miR-4767	hsa										1
miR-4633-3p	hsa										1
miR-4788	hsa										1
miR-4785	hsa										1
miR-6800-5p	hsa										1
miR-4740-5p	hsa										1
miR-6756-5p	hsa										1
miR-4435	hsa										1
miR-4430	hsa										1
miR-8064	hsa										1
miR-7157-5p	hsa										1
miR-6816-5p	hsa										1
miR-6802-5p	hsa										1
miR-4327	hsa										1
miR-3157-3p	hsa										1
miR-378c	hsa										1
miR-378i	hsa										1
miR-193a-5p	hsa										1
miR-4302	hsa										1
miR-7112-5p	hsa										1
miR-135b-3p	hsa										1
miR-509-3-5p	hsa										1
miR-7-5p	hsa										1
miR-3656	hsa										1
miR-6719-3p	hsa										1
miR-6771-3p	hsa										1
miR-3154	hsa										1
miR-769-5p	hsa										1
miR-34b-5p	hsa										1
miR-208a-3p	hsa										1
miR-6747-5p	hsa										1
miR-4726-3p	hsa										1
miR-550a-3p	hsa										1
miR-6859-5p	hsa										1
miR-6737-5p	hsa										1
miR-1471	hsa										1
miR-6734-5p	hsa										1
miR-4442	hsa										1
miR-571	hsa										1
miR-5007-3p	hsa										1
miR-519e-5p	hsa										1
miR-6499-5p	hsa										1
miR-6758-3p	hsa										1
miR-802	hsa										1
miR-718	hsa										1
miR-4727-5p	hsa										1
miR-548b-5p	hsa										1
miR-505-5p	hsa										1
miR-6893-5p	hsa										1
miR-5010-5p	hsa										1
miR-6767-5p	hsa										1
miR-3679-5p	hsa										1
miR-148a-5p	hsa										1
miR-5584-5p	hsa										1
miR-5585-3p	hsa										1
miR-1178-5p	hsa										1
miR-3121-3p	hsa										1
miR-5699-5p	hsa										1
miR-7847-3p	hsa										1
miR-588	hsa										1
miR-4451	hsa										1
miR-4455	hsa										1
miR-4459	hsa										1
miR-569	hsa										1
miR-566	hsa										1
miR-567	hsa										1
miR-6829-5p	hsa										1
miR-9500	hsa										1
miR-5093	hsa										1
miR-5095	hsa										1
miR-576-3p	hsa										1
miR-4476	hsa										1
miR-128-2-5p	hsa										1
miR-892b	hsa										1
miR-6820-5p	hsa										1
miR-1254	hsa										1
miR-4321	hsa										1
miR-1268b	hsa										1
miR-16-2-3p	hsa										1
miR-3074-5p	hsa										1
miR-4668-5p	hsa										1
miR-3677-3p	hsa										1
miR-548ay-5p	hsa										1
miR-6772-5p	hsa										1
miR-887-3p	hsa										1
miR-6808-5p	hsa										1
miR-3674	hsa										1
miR-4682	hsa										1
miR-1236-5p	hsa										1
miR-3653-3p	hsa										1
miR-150-3p	hsa										1
miR-1273h-3p	hsa										1
miR-6825-3p	hsa										1
miR-4485-5p	hsa										1
miR-4468	hsa										1
miR-4465	hsa										1
miR-4462	hsa										1
miR-4461	hsa										1
miR-9-3p	hsa										1
miR-491-5p	hsa										1
miR-6165	hsa										1
miR-892c-5p	hsa										1
miR-6812-5p	hsa										1
miR-1246	hsa										1
miR-4659a-5p	hsa										1
miR-489-3p	hsa										1
miR-4261	hsa										1
miR-494-3p	hsa										1
miR-1268a	hsa										1
miR-218-2-3p	hsa										1
miR-6840-5p	hsa										1
miR-5585-5p	hsa										1
miR-4715-5p	hsa										1
miR-5088-5p	hsa										1
miR-331-5p	hsa										1
miR-4672	hsa										1
miR-6801-5p	hsa										1
miR-548ad-5p	hsa										1
miR-5588-3p	hsa										1
miR-99a-5p	hsa										1
miR-6882-5p	hsa										1
miR-3128	hsa										1
miR-3125	hsa										1
miR-7975	hsa										1
miR-4677-3p	hsa										1
miR-4638-3p	hsa										1
miR-365a-3p	hsa										1
miR-135a-3p	hsa										1
miR-3909	hsa										1
miR-4271	hsa										1
miR-6881-5p	hsa										1
miR-4787-5p	hsa										1
miR-3610	hsa										1
miR-3611	hsa										1
miR-6849-5p	hsa										1
miR-6858-5p	hsa										1
miR-6086	hsa										1
miR-7109-5p	hsa										1
miR-6770-3p	hsa										1
miR-619-5p	hsa										1
miR-6744-5p	hsa										1
miR-4486	hsa										1
miR-4487	hsa										1
miR-4648	hsa										1
miR-4644	hsa										1
miR-1271-3p	hsa										1
miR-448	hsa										1
miR-3131	hsa										1
miR-3132	hsa										1
miR-7114-5p	hsa										1
miR-3138	hsa										1
miR-187-5p	hsa										1
miR-4801	hsa										1
miR-668-5p	hsa										1
miR-3173-3p	hsa										1
miR-1180-5p	hsa										1
miR-3915	hsa										1
miR-3910	hsa										1
miR-3919	hsa										1
miR-6874-5p	hsa										1
miR-1973	hsa										1
miR-1914-3p	hsa										1
miR-1972	hsa										1
miR-6749-5p	hsa										1
miR-151b	hsa										1
miR-4651	hsa										1
miR-638	hsa										1
miR-128-1-5p	hsa										1
miR-3158-5p	hsa										1
miR-3926	hsa										1
miR-6891-5p	hsa										1
miR-23a-3p	hsa										1
miR-6786-5p	hsa										1
miR-642b-3p	hsa										1
miR-5008-5p	hsa										1
miR-6089	hsa										1
miR-6752-5p	hsa										1
miR-4534	hsa										1
miR-4530	hsa										1
miR-4532	hsa										1
miR-942-3p	hsa										1
miR-3935	hsa										1
miR-3665	hsa										1
miR-6872-5p	hsa										1
miR-4695-5p	hsa										1
miR-6806-5p	hsa										1
miR-4634	hsa										1
miR-652-5p	hsa										1
miR-6815-3p	hsa										1
miR-3176	hsa										1
miR-1468-3p	hsa										1
miR-6090	hsa										1
miR-1225-5p	hsa										1
miR-197-5p	hsa										1
miR-1288-3p	hsa										1
miR-4753-5p	hsa										1
miR-4734	hsa										1
miR-4728-5p	hsa										1
miR-4739	hsa										1
miR-4793-5p	hsa										1
miR-7641	hsa										1
miR-6068	hsa										1
miR-662	hsa										1
miR-4512	hsa										1
miR-4516	hsa										1
miR-128-3p	hsa										1
miR-6753-5p	hsa										1
miR-18a-3p	hsa										1
miR-8063	hsa										1
miR-4281	hsa										1
miR-4284	hsa										1
miR-25-3p	hsa										1
miR-664b-5p	hsa										1
miR-7704	hsa										1
miR-4721	hsa										1
miR-6075	hsa										1
miR-6071	hsa										1
miR-1227-5p	hsa										1
miR-1224-5p	hsa										1
miR-1915-3p	hsa										1
miR-3960	hsa										1
miR-3663-3p	hsa										1
miR-3928-5p	hsa										1
miR-3197	hsa										1
miR-3195	hsa										1
miR-6850-3p	hsa										1
miR-191-5p	hsa										1
miR-4741	hsa										1
miR-532-5p	hsa										1
miR-1233-5p	hsa										1
miR-103a-2-5p	hsa										1
miR-2110	hsa										1
miR-6789-5p	hsa										1
miR-4417	hsa										1
miR-6125	hsa										1
miR-422a	hsa										1
miR-4685-5p	hsa										1
miR-6768-5p	hsa										1
miR-1229-5p	hsa										1
miR-1249-5p	hsa										1
miR-7110-5p	hsa										1
miR-208a-5p	hsa										1
miR-2276-3p	hsa										1
miR-1273c	hsa										1
miR-1255b-5p	hsa										1
miR-6845-5p	hsa										1
miR-4423-3p	hsa										1
miR-6769a-5p	hsa										1
miR-4687-3p	hsa										1
miR-1202	hsa										1
miR-516a-5p	hsa										1
miR-188-5p	hsa										1
miR-664a-5p	hsa										1
miR-5787	hsa										1
miR-4784	hsa										1
miR-4746-3p	hsa										1
miR-6720-5p	hsa										1
miR-937-5p	hsa										1
miR-6510-5p	hsa										1
miR-6728-5p	hsa										1
miR-4306	hsa										1
miR-6869-5p	hsa										1
miR-3651	hsa										1
miR-6791-5p	hsa										1
miR-7150	hsa										1
miR-4444	hsa										1
miR-4449	hsa										1
miR-4763-3p	hsa										1
miR-572	hsa										1
miR-575	hsa										1
miR-628-3p	hsa										1
miR-6512-5p	hsa										1
miR-4659b-3p	hsa										1
miR-6775-5p	hsa										1
miR-371b-5p	hsa										1
miR-564	hsa										1
miR-5096	hsa										1
miR-6799-5p	hsa										1
miR-4745-5p	hsa										1
miR-3616-3p	hsa										1
miR-328-5p	hsa										1
miR-7108-5p	hsa										1
miR-4689	hsa										1
miR-4466	hsa										1
miR-4463	hsa										1
miR-4669	hsa										1
miR-4660	hsa										1
miR-6850-5p	hsa										1
miR-6851-5p	hsa										1
miR-7846-3p	hsa										1
miR-642a-3p	hsa										1
miR-6819-5p	hsa										1
miR-1248	hsa										1
miR-1180-3p	hsa										1
miR-1910-5p	hsa										1
miR-3940-5p	hsa										1
miR-361-5p	hsa										1
miR-1207-5p	hsa										1
miR-762	hsa										1
miR-134-5p	hsa										1
miR-6738-5p	hsa										1
miR-1237-5p	hsa										1
miR-6780a-5p	hsa										1
miR-3074-3p	hsa										1
miR-6821-5p	hsa										1
miR-4270	hsa										1
miR-1183	hsa										1
miR-1181	hsa										1
miR-1291	hsa										1
miR-130b-3p	hsa										1
miR-4485-3p	hsa										1
miR-4488	hsa										1
miR-6516-3p	hsa										1
miR-5001-5p	hsa										1
miR-3137	hsa										1
miR-1249-3p	hsa										1
miR-5190	hsa										1
miR-378a-3p	hsa										1
miR-1273h-5p	hsa										1
let-7e-5p		hsa									1
let-7i-5p		hsa									1
miR-106b-3p		hsa									1
miR-125b-5p		hsa									1
miR-136-5p		hsa									1
miR-216a-5p		hsa									1
miR-217		hsa									1
miR-221-3p		hsa									1
miR-30a-3p		hsa									1
miR-323b-3p		hsa									1
miR-4765		hsa									1
miR-5187-5p		hsa									1
miR-98-5p		hsa									1
miR-99b-5p		hsa									1
miR-19a-3p			hsa								1
miR-15b-3p			hsa								1
miR-296-5p			hsa								1
miR-27a-3p			hsa								1
miR-374b-5p			hsa								1
miR-146b-3p			hsa								1
miR-625-5p			hsa								1
miR-671-3p			hsa								1
miR-103a-3p			hsa								1
let-7b				hsa							1
miR-1294				hsa							1
miR-342-5p				hsa							1
miR-486-5p				hsa							1
miR-1262					hsa						1
miR-526b*					hsa						1
miR-548i					hsa						1
miR-892a					hsa						1
miR-520c-3p					hsa						1
miR-126						hsa					1
miR-376a						hsa					1
miR-590-5p						hsa					1
miR-200b						hsa					1
miR-200c						hsa					1
miR-579						hsa					1
miR-93*							hsa				1
miR-361-3p							hsa				1
miR-574-3p							hsa				1
let-7a								mmu			1
miR-106b-5p								mmu			1
miR-145								mmu			1
miR-205								mmu			1
miR-301a								mmu			1
miR-574-5p								mmu			1
miR-142a-3p									mmu		1
miR-21a-5p									mmu		1
miR-30e-5p									mmu		1
miR-322-5p									mmu		1
miR-181c-5p									mmu		1
miR-126a-5p									mmu		1
miR-10a-5p									mmu		1
miR-143-3p									mmu		1
miR-215-5p									mmu		1
miR-155-5p										mmu

## Sheet: age-related diseases
miRNA	2021 raucci	2017 rani	2022 carini	2021 zhang	2021 zhao	2021 Guévremont	2008 Jeyaseelan	2012 dimmeler	2022 ryu	2019 zhang	2019 uwatoko	2017 kumar
	10.1007/s00018-021-03979-4	10.3389/fnagi.2017.00323	10.3390/genes13020231	10.1155/2021/6147434	10.3389/fncel.2021.771898	10.1002/dad2.12251	10.1161/STROKEAHA.107.500736	10.1002/emmm.201201986	10.1515/revneuro-2022-0039	10.2217/bmm-2018-0341	10.1186/s13041-019-0471-2	10.1016/bs.pmbts.2016.12.013
let-7e-5p						AD
miR-101-3p			Frailty Syndrome	PD								AD
miR-103a-3p										AD
miR-106a-5p												AD
miR-106b-3p										AD
miR-106b-5p												AD
miR-107										AD
miR-10a-5p		cognitive impairment
miR-10b-5p		cognitive impairment
miR-122-5p						AD
miR-124					neurological diseases
miR-1246										AD
miR-125a-5p		cognitive impairment
miR-125b-5p		cognitive impairment								AD
miR-126												ALS
miR-1260a										AD
miR-126-5p										AD
miR-1274a												AD
miR-128												dementia, HD
miR-1306-5p										AD
miR-130b-3p												HD
miR-132					neurological diseases							dementia
miR-132-3p						AD
miR-134												dementia
miR-138-5p												AD
miR-140-3p		cognitive impairment
miR-142-3p						AD				AD
miR-142-5p			Frailty Syndrome
miR-143-3p						AD						AD
miR-1468												AD
miR-146a					neurological diseases
miR-148a-3p						AD
miR-148b-5p										AD		AD
miR-151a-3p												AD
miR-151a-5p										AD
miR-151b												AD
miR-15a-5p												AD
miR-1600-5p										AD
miR-181c-3p										AD
miR-186-5p		cognitive impairment				AD						AD
miR-18a-5p										AD
miR-18b-5p												AD
miR-193b-3p						AD
miR-195-5p						AD
miR-1975												AD
miR-199a-3p						AD
miR-19b-3p											PD
miR-200a-3p										AD
miR-20a-5p												AD
miR-20b-5p						AD
miR-21					neurological diseases
miR-217								vascular aging
miR-222-3p												HD
miR-223												PD
miR-223-3p												HD
miR-223-5p												HD
miR-22-3p										AD
miR-22-5p												HD
miR-23b-3p		cognitive impairment
miR-24												PD
miR-24-3p											PD
miR-26a-5p										AD
miR-26b-3p												AD
miR-26b-5p		cognitive impairment
miR-27a-3p						AD						AD
miR-27b-3p						AD
miR-28-3p												AD
miR-29								vascular aging
miR-29c-3p						AD
miR-301a-3p										AD
miR-3065-5p												AD
miR-30b-5p										AD
miR-30c-5p		cognitive impairment				AD						AD
miR-30d-5p												AD, HD
miR-30e-5p												AD
miR-3158-3p												AD
miR-320-3p						AD
miR-320a										AD
miR-320b										AD
miR-320c										AD
miR-323-3p												dementia
miR-323b-5p												AD
miR-324-3p												PD
miR-324-5p						AD
miR-335-5p						AD						AD
miR-338-3p												HD
miR-33a-5p										AD
miR-340-5p						AD
miR-342-3p		cognitive impairment				AD				AD
miR-34a	vascular diseases							vascular aging		AD
miR-34c										AD
miR-361-5p												AD, HD
miR-365-3p						AD
miR-378-3p						AD
miR-378a-3p		cognitive impairment
miR-382												dementia
miR-383							stroke
miR-425-5p						AD						AD, HD
miR-4258												ALS
miR-451a		cognitive impairment
miR-4649-5p												ALS
miR-4781-3p												AD
miR-483-5p						AD				AD
miR-485									AD
miR-486-3p						AD
miR-486-5p						AD				AD
miR-5001-3p												AD
miR-501-3p										AD
miR-502-3p										AD
miR-532-5p						AD
miR-545-3p												AD
miR-548at-5p												AD
miR-550a-5p												AD
miR-563												AD
miR-582-5p												AD
miR-600												AD
miR-6119-5p										AD
miR-628-3p												HD
miR-6513-3p												AD
miR-652-3p						AD
miR-659-5p												AD
miR-663b												ALS
mir-874												dementia
miR-877-5p												HD
miR-885-5p						AD
miR–9										AD		AD
miR-92a-3p						AD
miR-93-3p						AD
miR-93-5p						AD						AD
miR-942												HD
miR-99a-5p		cognitive impairment
