# Supplementary material for: Engineering extracellular vesicles to permeabilize the blood-brain barrier
Source: Research Square preprint supplement (doi:10.21203/rs.3.rs-4509869/v1), 2024-06-26
Supplement: Supplementary file 4 [file aaacb5566a272b677a2e329d.docx]

**Table S4** - Antibodies used for Western Blot, with dilutions used and size of the proteins to detect.

| **Antibody** | **Reference** | **Host species** | **Dilution** | **Protein Size** |
| --- | --- | --- | --- | --- |
| Anti-Human CD9 Puro 0.1 mg | BD Biosciences #555370 | Mouse | 1:250 | 24 KDa |
| Anti-Human CD63 Puro 0.1 mg | BD Biosciences #556019 | Mouse | 1:250 | 53 KDa |
| Anti-Alix (1A12) | Santa Cruz Biotechnology #sc-53540 | Mouse | 1:500 | 97 KDa |
| Anti-Calnexin (AF18) | Santa Cruz Biotechnology #sc-23954 | Mouse | 1:250 | 67KDa |
| Anti-GAPDH (G-9) | Santa Cruz Biotechnology #sc-365062 | Mouse | 1:250 | 30 KDa |
| Anti-mouse IgG/HRP-linked antibody | Cell Signaling #7076S | Goat | 1:10000 | - |

**Table S5** - RT-qPCR primers used for the gene expression analysis.

| **Gene** | **Forward primer (5’ to 3’)** | **Reverse primer (5’ to 3’)** |
| --- | --- | --- |
| ACTB | ACTCTTCCAGCCTTCCTTC | GATGTCCAGCTCACACTTC |
| Claudin 5 | TTAACAGACGGAATGAAGTT | AAGCGAAATCCTCAGTCT |
| ZO-1 | CCTGAACCAGTATCTGATAA | AATCTTCTCACTCCTTCTG |
| vWF | TGTATCTAGAAACTGAGGCTG | CCTTCTTGGGTCATAAAGTC |
| Occludin | TTCTGGATCTCTATATGGTTCA | CCACAACACAGTAGTGATAC |
| ATF4 | CTCCGGGACAGATTGGATGTT | GGCTGCTTATTAGTCTCCTGGAC |
| VEGFA | AACTTCTGGGCTGTTCTC | CTCTCCTCTTCCTTCTCTTC |
| ZBTB34 | GCAGGGGAAACTATGTGACATC | CCCGGAAATATGGGGAGCTG |
| SEC61A1 | GGACCGCTATCACCCTCTTTA | TCCATCAATGTGCCTCTGTTAGA |
| STX16 | TCAGGCATCAGCTTAGATCCA | GCTTAATCCGGCCAACATCATA |
| ZNF354B | GCCTTCAGCCATAGTGCATC | AGGGAAGTGCTGTAACTGGAT |
| JARID2 | ACCAGTCTAAGGGATTAGGACC | TGCTGGGACTATTCGGCTGA |
| MED28 | GCCTACTACACCAGCC | CATGTTTGGAATGGCG |
| AEN | CTTCCAGGCGCTCAAGTATGT | GGGCCAGGTCCTTTAGAGAGA |
| ZMAT4 | ATTCACAGACAGTTACTGCAAGG | GCATGTTTTCGACTCTCGTAGTG |
| CLASP1 | CTGTCTCTGCCTTATAGCAACAC | CATCTCGAACCTGGCTGTTTG |
| DHX33 | GATGAAGCTCACGAACGGACT | CCACATCCATCGTAGCTGACA |
| NRP1 | AGAAGATTGTGCAAAACCAG | TAAGGTCTTCAACACATTGC |
| RAB4A | ATGCAGGAACTGGCAAATCTTGC | CGTTCTTGTCCTGCTGTATCCC |
| PTEN | GGCTAAGTGAAGATGACAATC | GTTACTCCCTTTTTGTCTCTG |
| MFSD2A | CAAACTTATTACTGGCTTCCTC | AGATGGGAATGGTTAAAGTG |
| NR3C2 | GAAAGACGGTGGGGTCAAGTT | ACCGGAAACACAGCTTACGTT |

**Table S6** - Primary antibodies used for immunocytochemistry, with fixation method and dilutions used.

| **Antibody** | **Reference** | **Dilution** | **Host species** | **Fixation** | **Permeabilization** |
| --- | --- | --- | --- | --- | --- |
| Anti-claudin 5 | Invitrogen #34-1600 | 1:100 | Rabbit | Methanol:acetone | The fixation protocol already permeabilizes |
| Anti-ZO-1 | Invitrogen #61-7300 | 1:200 | Rabbit | PFA | 0.1% Triton-X 100 |
| Anti-β-catenin | Abcam #ab6302 | 1:1000 | Rabbit | PFA | 0.1% Triton-X 100 |
| Anti-occludin | Invitrogen #711500 | 1:125 | Rabbit | Methanol:acetone | The fixation protocol already permeabilizes |
| Anti-vWF | Dako #A0082 | 1:200 | Rabbit | PFA | 0.1% Triton-X 100 |
| Anti-CD31 | Dako #M0823 | 1:75 | Mouse | PFA | No permeabilization needed |

**Table S7** - Secondary antibodies used.

| **Secondary antibody** | **Reference** | **Dilution** | **Host species** |
| --- | --- | --- | --- |
| Alexa Fluor 488 anti-rabbit | Invitrogen #A11034 | 1:600 | Goat |
| Alexa Fluor 555 anti-mouse | Invitrogen #A21422 | 1:600 | Goat |
